# Supplementary material
Source: publisher figshare collection journal article supplement (https://frontiersin.figshare.com/ndownloader/files/33648848)
Supplement: Supplementary file 1 [file 33648848]

# Supplementary information

## List of videos and images of additionally described behaviors.

Video 1: Active escape (fly)

Video 2: Active escape (walk)

Video 3: Bounce

Video 4: Evade

Video 5: Hug

Video 6: Raise

Video 7: Stretch

Video 8: Sway and walk

Video 9: Walk

Image 1: Flatten

Image 2: Hang

## Figure S1.

Schematic drawing of the experimental setup to examine phasmid behavior in response to a wind stimulus. An adult *C. flavopennis* is hanging from a wooden dowel inside an observation enclosure. Behind the dowel is the video camera for behavioral recordings, in front of the dowel is the uncovered, portable fan on its fixed track. For clarity, the fan is drawn here at the right side of the track, not in parallel with the phasmid as during the observations.


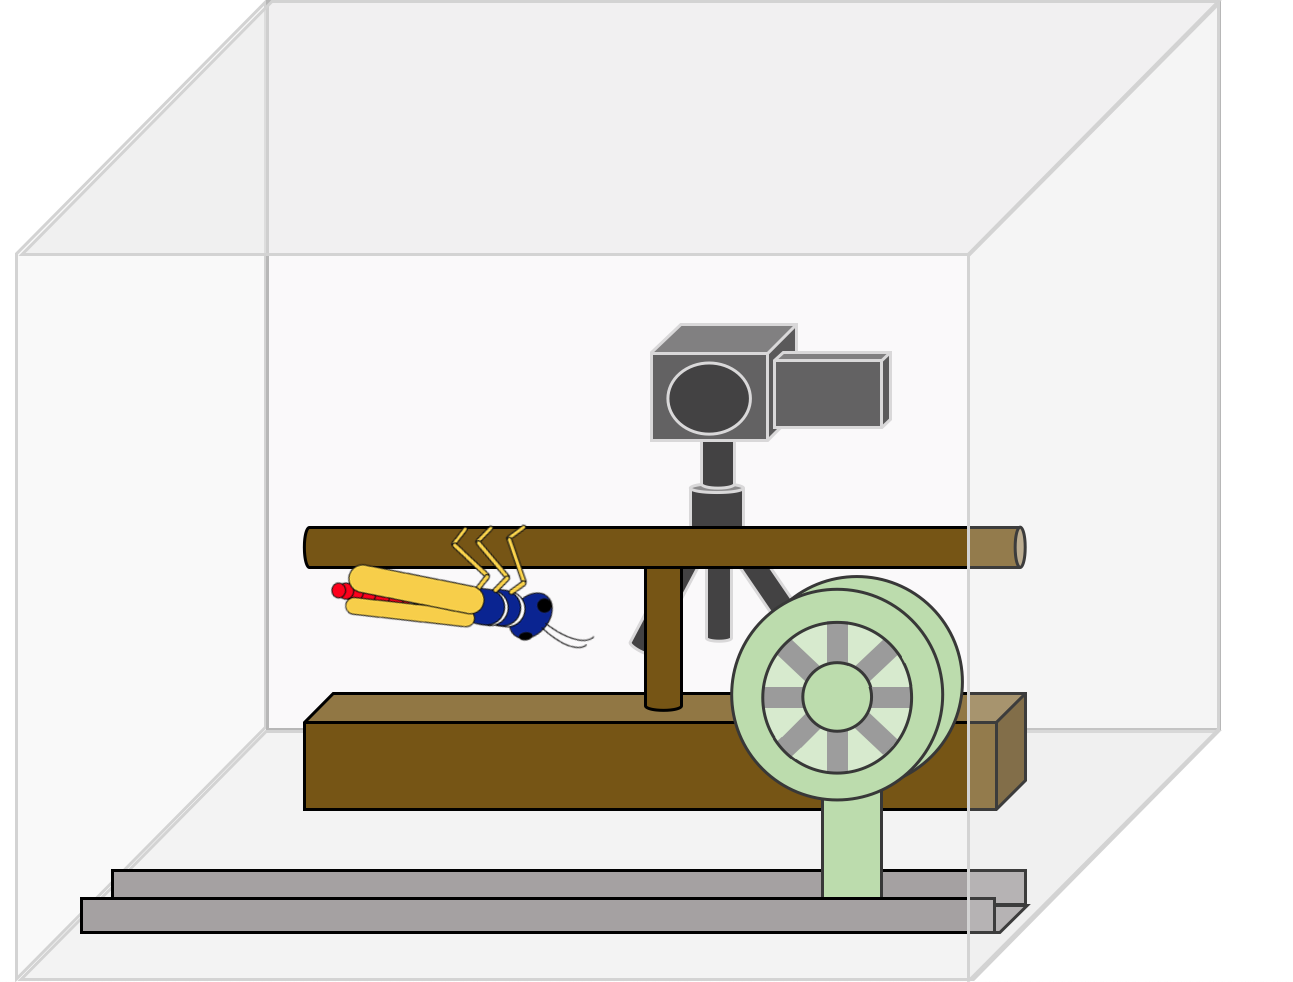


## Figure S2.

Heat map of the pairwise comparisons of overall behavioral responses across treatments, species and life stages. Dots denote comparisons between wind and control treatments for individuals of the same morphological type. The intensity of green in the squares indicates significance levels of Benjamini-Hochberg adjusted *p*-values of comparisons: Dark green: *p* < 0.001, medium green: *p* < 0.01, light green: *p* < 0.05; while white squares represent comparisons that were not statistically significant. Black boxes indicate no comparison (same morphological type and treatment).


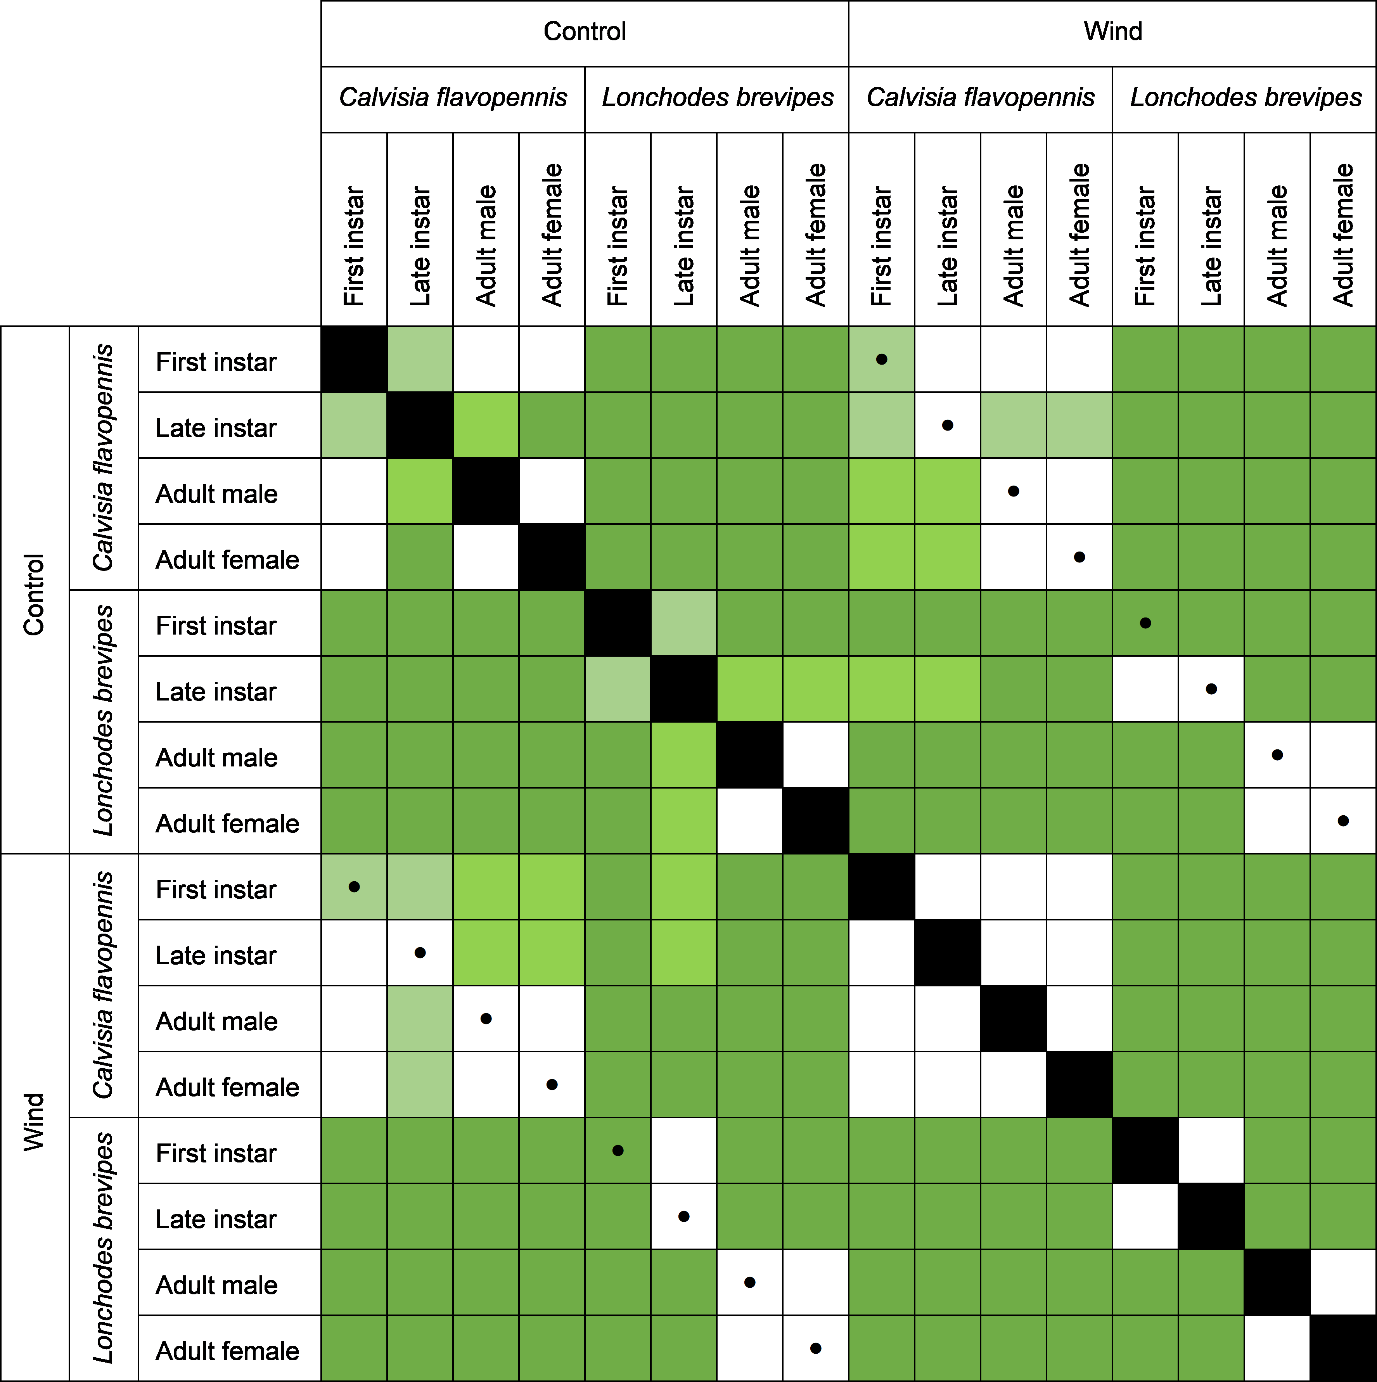


## Table S1.

Full results of the pairwise comparisons of overall behavioral responses between all combinations of morphological types and treatments. Sig.: significance level of Benjamini-Hochberg adjusted *p*-value. ***: *p* < 0.001, **: *p* < 0.01, *: *p* < 0.05, n.s.: not significant.

| Group 1 | Group 2 | df | Sums of squares | F model | *R2* | adjusted *p*-value | Sig. |
| --- | --- | --- | --- | --- | --- | --- | --- |
| *C. flavopennis* first instar, control | *C. flavopennis* late instar, control | 1 | 1.20 | 4.91 | 0.114 | 0.024 | * |
| *C. flavopennis* first instar, control | *C. flavopennis* adult male, control | 1 | 0.18 | 1.29 | 0.033 | 0.296 | n.s. |
| *C. flavopennis* first instar, control | *C. flavopennis* adult female, control | 1 | 0.17 | 1.28 | 0.033 | 0.323 | n.s. |
| *C. flavopennis* first instar, control | *L. brevipes* first instar, control | 1 | 5.07 | 25.63 | 0.403 | 0.000 | *** |
| *C. flavopennis* first instar, control | *L. brevipes* late instar, control | 1 | 3.43 | 12.60 | 0.249 | 0.000 | *** |
| *C. flavopennis* first instar, control | *L. brevipes* adult male, control | 1 | 5.95 | 35.26 | 0.481 | 0.000 | *** |
| *C. flavopennis* first instar, control | *L. brevipes* adult female, control | 1 | 5.11 | 29.57 | 0.438 | 0.000 | *** |
| *C. flavopennis* first instar, control | *C. flavopennis* first instar, wind | 1 | 0.92 | 3.82 | 0.091 | 0.019 | * |
| *C. flavopennis* first instar, control | *C. flavopennis* late instar, wind | 1 | 0.64 | 2.52 | 0.062 | 0.095 | n.s. |
| *C. flavopennis* first instar, control | *C. flavopennis* adult male, wind | 1 | 0.21 | 1.05 | 0.027 | 0.390 | n.s. |
| *C. flavopennis* first instar, control | *C. flavopennis* adult female, wind | 1 | 0.24 | 1.15 | 0.029 | 0.318 | n.s. |
| *C. flavopennis* first instar, control | *L. brevipes* first instar, wind | 1 | 5.10 | 20.57 | 0.351 | 0.000 | *** |
| *C. flavopennis* first instar, control | *L. brevipes* late instar, wind | 1 | 5.02 | 19.96 | 0.344 | 0.000 | *** |
| *C. flavopennis* first instar, control | *L. brevipes* adult male, wind | 1 | 6.75 | 45.77 | 0.546 | 0.000 | *** |
| *C. flavopennis* first instar, control | *L. brevipes* adult female, wind | 1 | 7.30 | 61.62 | 0.619 | 0.000 | *** |
| *C. flavopennis* late instar, control | *C. flavopennis* adult male, control | 1 | 2.18 | 10.73 | 0.220 | 0.001 | ** |
| *C. flavopennis* late instar, control | *C. flavopennis* adult female, control | 1 | 2.19 | 10.70 | 0.220 | 0.000 | *** |
| *C. flavopennis* late instar, control | *L. brevipes* first instar, control | 1 | 3.66 | 13.79 | 0.266 | 0.000 | *** |
| *C. flavopennis* late instar, control | *L. brevipes* late instar, control | 1 | 2.42 | 7.13 | 0.158 | 0.000 | *** |
| *C. flavopennis* late instar, control | *L. brevipes* adult male, control | 1 | 4.98 | 21.09 | 0.357 | 0.000 | *** |
| *C. flavopennis* late instar, control | *L. brevipes* adult female, control | 1 | 4.58 | 19.04 | 0.334 | 0.000 | *** |
| *C. flavopennis* late instar, control | *C. flavopennis* first instar, wind | 1 | 1.09 | 3.52 | 0.085 | 0.026 | * |
| *C. flavopennis* late instar, control | *C. flavopennis* late instar, wind | 1 | 0.29 | 0.90 | 0.023 | 0.433 | n.s. |
| *C. flavopennis* late instar, control | *C. flavopennis* adult male, wind | 1 | 1.25 | 4.73 | 0.111 | 0.019 | * |
| *C. flavopennis* late instar, control | *C. flavopennis* adult female, wind | 1 | 1.15 | 4.11 | 0.098 | 0.019 | * |
| *C. flavopennis* late instar, control | *L. brevipes* first instar, wind | 1 | 3.49 | 11.07 | 0.226 | 0.000 | *** |
| *C. flavopennis* late instar, control | *L. brevipes* late instar, wind | 1 | 3.52 | 11.05 | 0.225 | 0.000 | *** |
| *C. flavopennis* late instar, control | *L. brevipes* adult male, wind | 1 | 5.53 | 25.72 | 0.404 | 0.000 | *** |
| *C. flavopennis* late instar, control | *L. brevipes* adult female, wind | 1 | 6.09 | 32.75 | 0.463 | 0.000 | *** |
| *C. flavopennis* adult male, control | *C. flavopennis* adult female, control | 1 | 0.03 | 0.26 | 0.007 | 1.000 | n.s. |
| *C. flavopennis* adult male, control | *L. brevipes* first instar, control | 1 | 5.38 | 34.25 | 0.474 | 0.000 | *** |
| *C. flavopennis* adult male, control | *L. brevipes* late instar, control | 1 | 3.88 | 16.76 | 0.306 | 0.000 | *** |
| *C. flavopennis* adult male, control | *L. brevipes* adult male, control | 1 | 6.58 | 51.45 | 0.575 | 0.000 | *** |
| *C. flavopennis* adult male, control | *L. brevipes* adult female, control | 1 | 5.69 | 43.10 | 0.531 | 0.000 | *** |
| *C. flavopennis* adult male, control | *C. flavopennis* first instar, wind | 1 | 1.24 | 6.18 | 0.140 | 0.004 | ** |
| *C. flavopennis* adult male, control | *C. flavopennis* late instar, wind | 1 | 1.25 | 5.82 | 0.133 | 0.004 | ** |
| *C. flavopennis* adult male, control | *C. flavopennis* adult male, wind | 1 | 0.36 | 2.30 | 0.057 | 0.110 | n.s. |
| *C. flavopennis* adult male, control | *C. flavopennis* adult female, wind | 1 | 0.46 | 2.70 | 0.066 | 0.052 | n.s. |
| *C. flavopennis* adult male, control | *L. brevipes* first instar, wind | 1 | 5.72 | 27.62 | 0.421 | 0.000 | *** |
| *C. flavopennis* adult male, control | *L. brevipes* late instar, wind | 1 | 5.69 | 27.04 | 0.416 | 0.000 | *** |
| *C. flavopennis* adult male, control | *L. brevipes* adult male, wind | 1 | 7.52 | 70.50 | 0.650 | 0.000 | *** |
| *C. flavopennis* adult male, control | *L. brevipes* adult female, wind | 1 | 8.08 | 104.10 | 0.733 | 0.000 | *** |
| *C. flavopennis* adult female, control | *L. brevipes* first instar, control | 1 | 5.68 | 35.84 | 0.485 | 0.000 | *** |
| *C. flavopennis* adult female, control | *L. brevipes* late instar, control | 1 | 3.97 | 17.02 | 0.309 | 0.000 | *** |
| *C. flavopennis* adult female, control | *L. brevipes* adult male, control | 1 | 6.60 | 51.05 | 0.573 | 0.000 | *** |
| *C. flavopennis* adult female, control | *L. brevipes* adult female, control | 1 | 5.66 | 42.44 | 0.528 | 0.000 | *** |
| *C. flavopennis* adult female, control | *C. flavopennis* first instar, wind | 1 | 1.13 | 5.60 | 0.128 | 0.005 | ** |
| *C. flavopennis* adult female, control | *C. flavopennis* late instar, wind | 1 | 1.27 | 5.88 | 0.134 | 0.004 | ** |
| *C. flavopennis* adult female, control | *C. flavopennis* adult male, wind | 1 | 0.36 | 2.26 | 0.056 | 0.078 | n.s. |
| *C. flavopennis* adult female, control | *C. flavopennis* adult female, wind | 1 | 0.36 | 2.12 | 0.053 | 0.118 | n.s. |
| *C. flavopennis* adult female, control | *L. brevipes* first instar, wind | 1 | 5.74 | 27.50 | 0.420 | 0.000 | *** |
| *C. flavopennis* adult female, control | *L. brevipes* late instar, wind | 1 | 5.62 | 26.51 | 0.411 | 0.000 | *** |
| *C. flavopennis* adult female, control | *L. brevipes* adult male, wind | 1 | 7.47 | 69.07 | 0.645 | 0.000 | *** |
| *C. flavopennis* adult female, control | *L. brevipes* adult female, wind | 1 | 8.05 | 101.93 | 0.728 | 0.000 | *** |
| *L. brevipes* first instar, control | *L. brevipes* late instar, control | 1 | 0.98 | 3.35 | 0.081 | 0.033 | * |
| *L. brevipes* first instar, control | *L. brevipes* adult male, control | 1 | 4.46 | 23.47 | 0.382 | 0.000 | *** |
| *L. brevipes* first instar, control | *L. brevipes* adult female, control | 1 | 5.01 | 25.76 | 0.404 | 0.000 | *** |
| *L. brevipes* first instar, control | *C. flavopennis* first instar, wind | 1 | 3.08 | 11.70 | 0.235 | 0.000 | *** |
| *L. brevipes* first instar, control | *C. flavopennis* late instar, wind | 1 | 3.00 | 10.82 | 0.222 | 0.000 | *** |
| *L. brevipes* first instar, control | *C. flavopennis* adult male, wind | 1 | 4.35 | 20.00 | 0.345 | 0.000 | *** |
| *L. brevipes* first instar, control | *C. flavopennis* adult female, wind | 1 | 4.53 | 19.48 | 0.339 | 0.000 | *** |
| *L. brevipes* first instar, control | *L. brevipes* first instar, wind | 1 | 1.87 | 6.92 | 0.154 | 0.000 | *** |
| *L. brevipes* first instar, control | *L. brevipes* late instar, wind | 1 | 2.67 | 9.79 | 0.205 | 0.000 | *** |
| *L. brevipes* first instar, control | *L. brevipes* adult male, wind | 1 | 5.48 | 32.41 | 0.460 | 0.000 | *** |
| *L. brevipes* first instar, control | *L. brevipes* adult female, wind | 1 | 5.99 | 42.86 | 0.530 | 0.000 | *** |
| *L. brevipes* late instar, control | *L. brevipes* adult male, control | 1 | 1.76 | 6.64 | 0.149 | 0.002 | ** |
| *L. brevipes* late instar, control | *L. brevipes* adult female, control | 1 | 1.95 | 7.25 | 0.160 | 0.002 | ** |
| *L. brevipes* late instar, control | *C. flavopennis* first instar, wind | 1 | 1.71 | 5.05 | 0.117 | 0.001 | ** |
| *L. brevipes* late instar, control | *C. flavopennis* late instar, wind | 1 | 1.55 | 4.41 | 0.104 | 0.004 | ** |
| *L. brevipes* late instar, control | *C. flavopennis* adult male, wind | 1 | 2.66 | 9.09 | 0.193 | 0.000 | *** |
| *L. brevipes* late instar, control | *C. flavopennis* adult female, wind | 1 | 2.57 | 8.36 | 0.180 | 0.000 | *** |
| *L. brevipes* late instar, control | *L. brevipes* first instar, wind | 1 | 0.77 | 2.23 | 0.055 | 0.077 | n.s. |
| *L. brevipes* late instar, control | *L. brevipes* late instar, wind | 1 | 0.68 | 1.96 | 0.049 | 0.118 | n.s. |
| *L. brevipes* late instar, control | *L. brevipes* adult male, wind | 1 | 2.22 | 9.11 | 0.193 | 0.000 | *** |
| *L. brevipes* late instar, control | *L. brevipes* adult female, wind | 1 | 2.75 | 12.82 | 0.252 | 0.000 | *** |
| *L. brevipes* adult male, control | *L. brevipes* adult female, control | 1 | 0.10 | 0.59 | 0.015 | 0.547 | n.s. |
| *L. brevipes* adult male, control | *C. flavopennis* first instar, wind | 1 | 4.88 | 20.90 | 0.355 | 0.000 | *** |
| *L. brevipes* adult male, control | *C. flavopennis* late instar, wind | 1 | 3.66 | 14.77 | 0.280 | 0.000 | *** |
| *L. brevipes* adult male, control | *C. flavopennis* adult male, wind | 1 | 5.59 | 29.65 | 0.438 | 0.000 | *** |
| *L. brevipes* adult male, control | *C. flavopennis* adult female, wind | 1 | 5.01 | 24.66 | 0.394 | 0.000 | *** |
| *L. brevipes* adult male, control | *L. brevipes* first instar, wind | 1 | 3.68 | 15.30 | 0.287 | 0.000 | *** |
| *L. brevipes* adult male, control | *L. brevipes* late instar, wind | 1 | 2.32 | 9.52 | 0.200 | 0.000 | *** |
| *L. brevipes* adult male, control | *L. brevipes* adult male, wind | 1 | 0.11 | 0.79 | 0.020 | 0.474 | n.s. |
| *L. brevipes* adult male, control | *L. brevipes* adult female, wind | 1 | 0.13 | 1.15 | 0.029 | 0.433 | n.s. |
| *L. brevipes* adult female, control | *C. flavopennis* first instar, wind | 1 | 4.40 | 18.48 | 0.327 | 0.000 | *** |
| *L. brevipes* adult female, control | *C. flavopennis* late instar, wind | 1 | 3.23 | 12.81 | 0.252 | 0.000 | *** |
| *L. brevipes* adult female, control | *C. flavopennis* adult male, wind | 1 | 4.85 | 25.16 | 0.398 | 0.000 | *** |
| *L. brevipes* adult female, control | *C. flavopennis* adult female, wind | 1 | 4.25 | 20.49 | 0.350 | 0.000 | *** |
| *L. brevipes* adult female, control | *L. brevipes* first instar, wind | 1 | 3.96 | 16.21 | 0.299 | 0.000 | *** |
| *L. brevipes* adult female, control | *L. brevipes* late instar, wind | 1 | 2.49 | 10.06 | 0.209 | 0.000 | *** |
| *L. brevipes* adult female, control | *L. brevipes* adult male, wind | 1 | 0.20 | 1.37 | 0.035 | 0.334 | n.s. |
| *L. brevipes* adult female, control | *L. brevipes* adult female, wind | 1 | 0.22 | 1.88 | 0.047 | 0.294 | n.s. |
| *C. flavopennis* first instar, wind | *C. flavopennis* late instar, wind | 1 | 0.58 | 1.82 | 0.046 | 0.143 | n.s. |
| *C. flavopennis* first instar, wind | *C. flavopennis* adult male, wind | 1 | 0.60 | 2.31 | 0.057 | 0.075 | n.s. |
| *C. flavopennis* first instar, wind | *C. flavopennis* adult female, wind | 1 | 0.32 | 1.17 | 0.030 | 0.325 | n.s. |
| *C. flavopennis* first instar, wind | *L. brevipes* first instar, wind | 1 | 2.46 | 7.87 | 0.172 | 0.000 | *** |
| *C. flavopennis* first instar, wind | *L. brevipes* late instar, wind | 1 | 2.52 | 7.96 | 0.173 | 0.000 | *** |
| *C. flavopennis* first instar, wind | *L. brevipes* adult male, wind | 1 | 5.44 | 25.58 | 0.402 | 0.000 | *** |
| *C. flavopennis* first instar, wind | *L. brevipes* adult female, wind | 1 | 6.22 | 33.90 | 0.471 | 0.000 | *** |
| *C. flavopennis* late instar, wind | *C. flavopennis* adult male, wind | 1 | 0.60 | 2.16 | 0.054 | 0.114 | n.s. |
| *C. flavopennis* late instar, wind | *C. flavopennis* adult female, wind | 1 | 0.53 | 1.82 | 0.046 | 0.144 | n.s. |
| *C. flavopennis* late instar, wind | *L. brevipes* first instar, wind | 1 | 2.95 | 9.01 | 0.192 | 0.000 | *** |
| *C. flavopennis* late instar, wind | *L. brevipes* late instar, wind | 1 | 2.82 | 8.52 | 0.183 | 0.000 | *** |
| *C. flavopennis* late instar, wind | *L. brevipes* adult male, wind | 1 | 4.27 | 18.79 | 0.331 | 0.000 | *** |
| *C. flavopennis* late instar, wind | *L. brevipes* adult female, wind | 1 | 4.77 | 24.08 | 0.388 | 0.000 | *** |
| *C. flavopennis* adult male, wind | *C. flavopennis* adult female, wind | 1 | 0.18 | 0.77 | 0.020 | 0.534 | n.s. |
| *C. flavopennis* adult male, wind | *L. brevipes* first instar, wind | 1 | 3.66 | 13.65 | 0.264 | 0.000 | *** |
| *C. flavopennis* adult male, wind | *L. brevipes* late instar, wind | 1 | 3.79 | 13.95 | 0.269 | 0.000 | *** |
| *C. flavopennis* adult male, wind | *L. brevipes* adult male, wind | 1 | 6.25 | 37.30 | 0.495 | 0.000 | *** |
| *C. flavopennis* adult male, wind | *L. brevipes* adult female, wind | 1 | 6.97 | 50.39 | 0.570 | 0.000 | *** |
| *C. flavopennis* adult female, wind | *L. brevipes* first instar, wind | 1 | 3.78 | 13.38 | 0.260 | 0.000 | *** |
| *C. flavopennis* adult female, wind | *L. brevipes* late instar, wind | 1 | 3.54 | 12.39 | 0.246 | 0.000 | *** |
| *C. flavopennis* adult female, wind | *L. brevipes* adult male, wind | 1 | 5.57 | 30.61 | 0.446 | 0.000 | *** |
| *C. flavopennis* adult female, wind | *L. brevipes* adult female, wind | 1 | 6.24 | 40.81 | 0.518 | 0.000 | *** |
| *L. brevipes* first instar, wind | *L. brevipes* late instar, wind | 1 | 0.30 | 0.93 | 0.024 | 0.466 | n.s. |
| *L. brevipes* first instar, wind | *L. brevipes* adult male, wind | 1 | 3.78 | 17.24 | 0.312 | 0.000 | *** |
| *L. brevipes* first instar, wind | *L. brevipes* adult female, wind | 1 | 4.76 | 25.03 | 0.397 | 0.000 | *** |
| *L. brevipes* late instar, wind | *L. brevipes* adult male, wind | 1 | 2.26 | 10.15 | 0.211 | 0.000 | *** |
| *L. brevipes* late instar, wind | *L. brevipes* adult female, wind | 1 | 3.06 | 15.82 | 0.294 | 0.000 | *** |
| *L. brevipes* adult male, wind | *L. brevipes* adult female, wind | 1 | 0.07 | 0.77 | 0.020 | 0.558 | n.s. |

## Table S2.

Full results of Dunn’s post hoc tests on the differences between groups (characterized by morphological type and treatment) in the proportion of total duration of behavioral responses (a-h) that significantly contributed to the distribution pattern during nonmetric multidimensional scaling. We present Bonferroni corrected *p*‑values; significant *p*‑values (*p* < 0.05) are given in bold. Abbreviations: Cf: *Calvisia flavopennis*, Lb: *Lonchodes brevipes*, fi: first instar, li: late instar, am: adult male, af: adult female, C: control treatment, W: wind treatment.

a

| **Extension** | Cf fi, C | Cf li, C | Cf am, C | Cf af, C | Lb fi, C | Lb li, C | Lb am, C | Lb af, C | Cf fi, W | Cf li, W | Cf am, W | Cf af, W | Lb fi, W | Lb li, W | Lb am, W | Lb af, W |
| --- | --- | --- | --- | --- | --- | --- | --- | --- | --- | --- | --- | --- | --- | --- | --- | --- |
| Cf fi, C | - | 1 | 1 | 1 | 1 | 1 | **1.70E-07** | **1.25E-06** | 1 | 1 | 1 | 1 | 1 | 1 | **2.15E-08** | **1.21E-09** |
| Cf li, C | 1 | - | 1 | 1 | 1 | 1 | **1.70E-07** | **1.25E-06** | 1 | 1 | 1 | 1 | 1 | 1 | **2.15E-08** | **1.21E-09** |
| Cf am, C | 1 | 1 | - | 1 | 1 | 1 | **1.70E-07** | **1.25E-06** | 1 | 1 | 1 | 1 | 1 | 1 | **2.15E-08** | **1.21E-09** |
| Cf af, C | 1 | 1 | 1 | - | 1 | 1 | **1.70E-07** | **1.25E-06** | 1 | 1 | 1 | 1 | 1 | 1 | **2.15E-08** | **1.21E-09** |
| Lb fi, C | 1 | 1 | 1 | 1 | - | 1 | **4.88E-05** | **0.000** | 1 | 1 | 1 | 1 | 1 | 1 | **8.44E-06** | **7.15E-07** |
| Lb li, C | 1 | 1 | 1 | 1 | 1 | - | **0.024** | 0.085 | 1 | 1 | 1 | 1 | 1 | 1 | **0.006** | **0.001** |
| Lb am, C | **1.70E-07** | **1.70E-07** | **1.70E-07** | **1.70E-07** | **4.88E-05** | **0.024** | **-** | 1 | **1.70E-07** | **2.71E-05** | **1.70E-07** | **9.19E-07** | **0.000** | 0.055 | 1 | 1 |
| Lb af, C | **1.25E-06** | **1.25E-06** | **1.25E-06** | **1.25E-06** | **0.000** | 0.085 | 1 | - | **1.25E-06** | **0.000** | **1.25E-06** | **6.18E-06** | **0.002** | 0.180 | 1 | 1 |
| Cf fi, W | 1 | 1 | 1 | 1 | 1 | 1 | **1.70E-07** | **1.25E-06** | **-** | 1 | 1 | 1 | 1 | 1 | **2.15E-08** | **1.21E-09** |
| Cf li, W | 1 | 1 | 1 | 1 | 1 | 1 | **2.71E-05** | **0.000** | 1 | - | 1 | 1 | 1 | 1 | **4.54E-06** | **3.67E-07** |
| Cf am, W | 1 | 1 | 1 | 1 | 1 | 1 | **1.70E-07** | **1.25E-06** | 1 | 1 | - | 1 | 1 | 1 | **2.15E-08** | **1.21E-09** |
| Cf af, W | 1 | 1 | 1 | 1 | 1 | 1 | **9.19E-07** | **6.18E-06** | 1 | 1 | 1 | - | 1 | 1 | **1.27E-07** | **8.01E-09** |
| Lb fi, W | 1 | 1 | 1 | 1 | 1 | 1 | **0.000** | **0.002** | 1 | 1 | 1 | 1 | - | 1 | **6.75E-05** | **6.71E-06** |
| Lb li, W | 1 | 1 | 1 | 1 | 1 | 1 | 0.055 | 0.180 | 1 | 1 | 1 | 1 | 1 | - | **0.015** | **0.002** |
| Lb am, W | **2.15E-08** | **2.15E-08** | **2.15E-08** | **2.15E-08** | **8.44E-06** | **0.006** | 1 | 1 | **2.15E-08** | **4.54E-06** | **2.15E-08** | **1.27E-07** | **6.75E-05** | **0.01541** | **-** | 1 |
| Lb af, W | **1.21E-09** | **1.21E-09** | **1.21E-09** | **1.21E-09** | **7.15E-07** | **0.001** | 1 | 1 | **1.21E-09** | **3.67E-07** | **1.21E-09** | **8.01E-09** | **6.71E-06** | **0.002486** | 1 | - |

b

| **Exploration** | Cf fi, C | Cf li, C | Cf am, C | Cf af, C | Lb fi, C | Lb li, C | Lb am, C | Lb af, C | Cf fi, W | Cf li, W | Cf am, W | Cf af, W | Lb fi, W | Lb li, W | Lb am, W | Lb af, W |
| --- | --- | --- | --- | --- | --- | --- | --- | --- | --- | --- | --- | --- | --- | --- | --- | --- |
| Cf fi, C | - | 1 | 1 | 1 | 1 | 1 | 1 | 1 | 1 | 1 | 1 | 1 | **0.013** | **0.000** | 1 | 1 |
| Cf li, C | 1 | - | 1 | 1 | 1 | 1 | 1 | 1 | 1 | 1 | 1 | 1 | 0.091 | **0.002** | 1 | 1 |
| Cf am, C | 1 | 1 | - | 1 | 1 | 1 | 1 | 1 | 1 | 1 | 1 | 1 | **0.013** | **0.000** | 1 | 1 |
| Cf af, C | 1 | 1 | 1 | - | 1 | 1 | 1 | 1 | 1 | 1 | 1 | 1 | 0.094 | **0.002** | 1 | 1 |
| Lb fi, C | 1 | 1 | 1 | 1 | - | 1 | 1 | 1 | 1 | 1 | 1 | 1 | 0.086 | **0.001** | 1 | 1 |
| Lb li, C | 1 | 1 | 1 | 1 | 1 | - | 1 | 1 | 1 | 1 | 1 | 1 | 0.729 | **0.023** | 1 | 1 |
| Lb am, C | 1 | 1 | 1 | 1 | 1 | 1 | - | 1 | 1 | 1 | 1 | 1 | **0.013** | **0.000** | 1 | 1 |
| Lb af, C | 1 | 1 | 1 | 1 | 1 | 1 | 1 | - | 1 | 1 | 1 | 1 | **0.013** | **0.000** | 1 | 1 |
| Cf fi, W | 1 | 1 | 1 | 1 | 1 | 1 | 1 | 1 | - | 1 | 1 | 1 | 1 | 1 | 1 | 1 |
| Cf li, W | 1 | 1 | 1 | 1 | 1 | 1 | 1 | 1 | 1 | - | 1 | 1 | **0.013** | **0.000** | 1 | 1 |
| Cf am, W | 1 | 1 | 1 | 1 | 1 | 1 | 1 | 1 | 1 | 1 | - | 1 | **0.013** | **0.000** | 1 | 1 |
| Cf af, W | 1 | 1 | 1 | 1 | 1 | 1 | 1 | 1 | 1 | 1 | 1 | - | 1 | 0.575 | 1 | 1 |
| Lb fi, W | **0.013** | 0.091 | **0.013** | 0.094 | 0.086 | 0.729 | **0.013** | **0.013** | 1 | **0.013** | **0.013** | 1 | - | 1 | 0.108 | **0.013** |
| Lb li, W | **0.000** | **0.002** | **0.000** | **0.002** | **0.001** | **0.023** | **0.000** | **0.000** | 1 | **0.000** | **0.000** | 0.575 | 1 | - | **0.002** | **0.000** |
| Lb am, W | 1 | 1 | 1 | 1 | 1 | 1 | 1 | 1 | 1 | 1 | 1 | 1 | 0.108 | **0.002** | **-** | 1 |
| Lb af, W | 1 | 1 | 1 | 1 | 1 | 1 | 1 | 1 | 1 | 1 | 1 | 1 | **0.013** | **0.000** | 1 | - |

c

| **Flatten** | Cf fi, C | Cf li, C | Cf am, C | Cf af, C | Lb fi, C | Lb li, C | Lb am, C | Lb af, C | Cf fi, W | Cf li, W | Cf am, W | Cf af, W | Lb fi, W | Lb li, W | Lb am, W | Lb af, W |
| --- | --- | --- | --- | --- | --- | --- | --- | --- | --- | --- | --- | --- | --- | --- | --- | --- |
| Cf fi, C | - | **0.012** | 1 | 1 | 1 | 1 | 1 | 1 | 1 | 1 | 1 | 1 | 1 | 1 | 1 | 1 |
| Cf li, C | **0.012** | **-** | **2.42E-06** | **2.42E-06** | **2.42E-06** | **2.42E-06** | **2.42E-06** | **2.42E-06** | **0.001** | 1 | **0.001** | **0.001** | **2.42E-06** | **2.42E-06** | **0.001** | **4.41E-05** |
| Cf am, C | 1 | **2.42E-06** | **-** | 1 | 1 | 1 | 1 | 1 | 1 | 0.104 | 1 | 1 | 1 | 1 | 1 | 1 |
| Cf af, C | 1 | **2.42E-06** | 1 | - | 1 | 1 | 1 | 1 | 1 | 0.104 | 1 | 1 | 1 | 1 | 1 | 1 |
| Lb fi, C | 1 | **2.42E-06** | 1 | 1 | - | 1 | 1 | 1 | 1 | 0.104 | 1 | 1 | 1 | 1 | 1 | 1 |
| Lb li, C | 1 | **2.42E-06** | 1 | 1 | 1 | - | 1 | 1 | 1 | 0.104 | 1 | 1 | 1 | 1 | 1 | 1 |
| Lb am, C | 1 | **2.42E-06** | 1 | 1 | 1 | 1 | - | 1 | 1 | 0.104 | 1 | 1 | 1 | 1 | 1 | 1 |
| Lb af, C | 1 | **2.42E-06** | 1 | 1 | 1 | 1 | 1 | - | 1 | 0.104 | 1 | 1 | 1 | 1 | 1 | 1 |
| Cf fi, W | 1 | **0.001** | 1 | 1 | 1 | 1 | 1 | 1 | - | 1 | 1 | 1 | 1 | 1 | 1 | 1 |
| Cf li, W | 1 | 1 | 0.104 | 0.104 | 0.104 | 0.104 | 0.104 | 0.104 | 1 | - | 1 | 1 | 0.104 | 0.104 | 1 | 0.600 |
| Cf am, W | 1 | **0.001** | 1 | 1 | 1 | 1 | 1 | 1 | 1 | 1 | - | 1 | 1 | 1 | 1 | 1 |
| Cf af, W | 1 | **0.001** | 1 | 1 | 1 | 1 | 1 | 1 | 1 | 1 | 1 | - | 1 | 1 | 1 | 1 |
| Lb fi, W | 1 | **2.42E-06** | 1 | 1 | 1 | 1 | 1 | 1 | 1 | 0.104 | 1 | 1 | - | 1 | 1 | 1 |
| Lb li, W | 1 | **2.42E-06** | 1 | 1 | 1 | 1 | 1 | 1 | 1 | 0.104 | 1 | 1 | 1 | - | 1 | 1 |
| Lb am, W | 1 | **0.001** | 1 | 1 | 1 | 1 | 1 | 1 | 1 | 1 | 1 | 1 | 1 | 1 | - | 1 |
| Lb af, W | 1 | **4.41E-05** | 1 | 1 | 1 | 1 | 1 | 1 | 1 | 0.600 | 1 | 1 | 1 | 1 | 1 | - |

d

| **Hang** | Cf fi, C | Cf li, C | Cf am, C | Cf af, C | Lb fi, C | Lb li, C | Lb am, C | Lb af, C | Cf fi, W | Cf li, W | Cf am, W | Cf af, W | Lb fi, W | Lb li, W | Lb am, W | Lb af, W |
| --- | --- | --- | --- | --- | --- | --- | --- | --- | --- | --- | --- | --- | --- | --- | --- | --- |
| Cf fi, C | - | 1 | 1 | 1 | **0.000** | **0.002** | **0.000** | **0.007** | 1 | 1 | 1 | 1 | **7.85E-06** | **2.20E-05** | **2.80E-05** | **5.21E-05** |
| Cf li, C | 1 | - | 0.116 | 0.174 | 1 | 1 | 1 | 1 | 1 | 1 | 1 | 1 | 0.324 | 0.591 | 0.679 | 0.966 |
| Cf am, C | 1 | 0.116 | - | 1 | **2.57E-06** | **1.82E-05** | **2.57E-06** | **0.000** | 1 | 0.266 | 1 | 1 | **3.57E-08** | **1.18E-07** | **1.56E-07** | **3.21E-07** |
| Cf af, C | 1 | 0.174 | 1 | - | **4.97E-06** | **3.39E-05** | **4.97E-06** | **0.000** | 1 | 0.388 | 1 | 1 | **7.46E-08** | **2.42E-07** | **3.17E-07** | **6.46E-07** |
| Lb fi, C | **0.000** | 1 | **2.57E-06** | **4.97E-06** | **-** | 1 | 1 | 1 | 0.129 | 1 | 0.077 | **0.023** | 1 | 1 | 1 | 1 |
| Lb li, C | **0.002** | 1 | **1.82E-05** | **3.39E-05** | 1 | - | 1 | 1 | 0.421 | 1 | 0.264 | 0.086 | 1 | 1 | 1 | 1 |
| Lb am, C | **0.000** | 1 | **2.57E-06** | **4.97E-06** | 1 | 1 | - | 1 | 0.129 | 1 | 0.077 | **0.023** | 1 | 1 | 1 | 1 |
| Lb af, C | **0.007** | 1 | **0.000** | **0.000** | 1 | 1 | 1 | - | 1 | 1 | 0.803 | 0.290 | 1 | 1 | 1 | 1 |
| Cf fi, W | 1 | 1 | 1 | 1 | 0.129 | 0.421 | 0.129 | 1 | - | 1 | 1 | 1 | **0.009** | **0.019** | **0.022** | **0.035** |
| Cf li, W | 1 | 1 | 0.266 | 0.388 | 1 | 1 | 1 | 1 | 1 | - | 1 | 1 | 0.143 | 0.273 | 0.316 | 0.462 |
| Cf am, W | 1 | 1 | 1 | 1 | 0.077 | 0.264 | 0.077 | 0.803 | 1 | 1 | - | 1 | **0.005** | **0.010** | **0.013** | **0.020** |
| Cf af, W | 1 | 1 | 1 | 1 | **0.023** | 0.086 | **0.023** | 0.290 | 1 | 1 | 1 | - | **0.001** | **0.003** | **0.003** | **0.005** |
| Lb fi, W | **7.85E-06** | 0.324 | **3.57E-08** | **7.46E-08** | 1 | 1 | 1 | 1 | **0.009** | 0.143 | **0.005** | **0.001** | **-** | 1 | 1 | 1 |
| Lb li, W | **2.20E-05** | 0.591 | **1.18E-07** | **2.42E-07** | 1 | 1 | 1 | 1 | **0.019** | 0.273 | **0.010** | **0.003** | 1 | - | 1 | 1 |
| Lb am, W | **2.80E-05** | 0.679 | **1.56E-07** | **3.17E-07** | 1 | 1 | 1 | 1 | **0.022** | 0.316 | **0.013** | **0.003** | 1 | 1 | - | 1 |
| Lb af, W | **5.21E-05** | 0.966 | **3.21E-07** | **6.46E-07** | 1 | 1 | 1 | 1 | **0.035** | 0.462 | **0.020** | **0.005** | 1 | 1 | 1 | - |

e

| **Raised** | Cf fi, C | Cf li, C | Cf am, C | Cf af, C | Lb fi, C | Lb li, C | Lb am, C | Lb af, C | Cf fi, W | Cf li, W | Cf am, W | Cf af, W | Lb fi, W | Lb li, W | Lb am, W | Lb af, W |
| --- | --- | --- | --- | --- | --- | --- | --- | --- | --- | --- | --- | --- | --- | --- | --- | --- |
| Cf fi, C | - | 1 | 1 | 1 | 1 | 1 | 1 | 1 | **1.09E-08** | 1 | 1 | 1 | 1 | 1 | 1 | 1 |
| Cf li, C | 1 | - | 1 | 1 | 1 | 1 | 1 | 1 | **1.09E-08** | 1 | 1 | 1 | 1 | 1 | 1 | 1 |
| Cf am, C | 1 | 1 | - | 1 | 1 | 1 | 1 | 1 | **1.09E-08** | 1 | 1 | 1 | 1 | 1 | 1 | 1 |
| Cf af, C | 1 | 1 | 1 | - | 1 | 1 | 1 | 1 | **1.09E-08** | 1 | 1 | 1 | 1 | 1 | 1 | 1 |
| Lb fi, C | 1 | 1 | 1 | 1 | - | 1 | 1 | 1 | **1.09E-08** | 1 | 1 | 1 | 1 | 1 | 1 | 1 |
| Lb li, C | 1 | 1 | 1 | 1 | 1 | - | 1 | 1 | **1.09E-08** | 1 | 1 | 1 | 1 | 1 | 1 | 1 |
| Lb am, C | 1 | 1 | 1 | 1 | 1 | 1 | - | 1 | **1.09E-08** | 1 | 1 | 1 | 1 | 1 | 1 | 1 |
| Lb af, C | 1 | 1 | 1 | 1 | 1 | 1 | 1 | - | **1.09E-08** | 1 | 1 | 1 | 1 | 1 | 1 | 1 |
| Cf fi, W | **1.09E-08** | **1.09E-08** | **1.09E-08** | **1.09E-08** | **1.09E-08** | **1.09E-08** | **1.09E-08** | **1.09E-08** | **-** | **1.09E-08** | **1.09E-08** | **1.09E-08** | **7.59E-06** | **1.09E-08** | **1.09E-08** | **1.09E-08** |
| Cf li, W | 1 | 1 | 1 | 1 | 1 | 1 | 1 | 1 | **1.09E-08** | **-** | 1 | 1 | 1 | 1 | 1 | 1 |
| Cf am, W | 1 | 1 | 1 | 1 | 1 | 1 | 1 | 1 | **1.09E-08** | 1 | - | 1 | 1 | 1 | 1 | 1 |
| Cf af, W | 1 | 1 | 1 | 1 | 1 | 1 | 1 | 1 | **1.09E-08** | 1 | 1 | - | 1 | 1 | 1 | 1 |
| Lb fi, W | 1 | 1 | 1 | 1 | 1 | 1 | 1 | 1 | **7.59E-06** | 1 | 1 | 1 | - | 1 | 1 | 1 |
| Lb li, W | 1 | 1 | 1 | 1 | 1 | 1 | 1 | 1 | **1.09E-08** | 1 | 1 | 1 | 1 | - | 1 | 1 |
| Lb am, W | 1 | 1 | 1 | 1 | 1 | 1 | 1 | 1 | **1.09E-08** | 1 | 1 | 1 | 1 | 1 | - | 1 |
| Lb af, W | 1 | 1 | 1 | 1 | 1 | 1 | 1 | 1 | **1.09E-08** | 1 | 1 | 1 | 1 | 1 | 1 | - |

f

| **Stand** | Cf fi, C | Cf li, C | Cf am, C | Cf af, C | Lb fi, C | Lb li, C | Lb am, C | Lb af, C | Cf fi, W | Cf li, W | Cf am, W | Cf af, W | Lb fi, W | Lb li, W | Lb am, W | Lb af, W |
| --- | --- | --- | --- | --- | --- | --- | --- | --- | --- | --- | --- | --- | --- | --- | --- | --- |
| Cf fi, C | - | 1 | 1 | 1 | **7.49E-08** | 0.090 | 1 | 1 | 1 | 1 | 1 | 1 | 0.151 | 0.134 | 1 | 1 |
| Cf li, C | 1 | - | 1 | 1 | **6.77E-06** | 1 | 1 | 1 | 1 | 1 | 1 | 1 | 1 | 1 | 1 | 1 |
| Cf am, C | 1 | 1 | - | 1 | **1.03E-06** | 0.389 | 1 | 1 | 1 | 1 | 1 | 1 | 0.614 | 0.552 | 1 | 1 |
| Cf af, C | 1 | 1 | 1 | - | **7.49E-08** | 0.090 | 1 | 1 | 1 | 1 | 1 | 1 | 0.151 | 0.134 | 1 | 1 |
| Lb fi, C | **7.49E-08** | **6.77E-06** | **1.03E-06** | **7.49E-08** | **-** | 0.588 | **7.63E-07** | **4.58E-09** | **0.003** | **8.47E-06** | **6.26E-07** | **2.76E-07** | 0.372 | 0.415 | **4.58E-09** | **4.58E-09** |
| Lb li, C | 0.090 | 1 | 0.389 | 0.090 | 0.588 | - | 0.331 | **0.018** | 1 | 1 | 0.297 | 0.189 | 1 | 1 | **0.018** | **0.018** |
| Lb am, C | 1 | 1 | 1 | 1 | **7.63E-07** | 0.331 | - | 1 | 1 | 1 | 1 | 1 | 0.526 | 0.472 | 1 | 1 |
| Lb af, C | 1 | 1 | 1 | 1 | **4.58E-09** | **0.018** | 1 | - | 1 | 1 | 1 | 1 | **0.031** | **0.027** | 1 | 1 |
| Cf fi, W | 1 | 1 | 1 | 1 | **0.003231** | 1 | 1 | 1 | - | 1 | 1 | 1 | 1 | 1 | 1 | 1 |
| Cf li, W | 1 | 1 | 1 | 1 | **8.47E-06** | 1 | 1 | 1 | 1 | - | 1 | 1 | 1 | 1 | 1 | 1 |
| Cf am, W | 1 | 1 | 1 | 1 | **6.26E-07** | 0.297 | 1 | 1 | 1 | 1 | - | 1 | 0.474 | 0.425 | 1 | 1 |
| Cf af, W | 1 | 1 | 1 | 1 | **2.76E-07** | 0.189 | 1 | 1 | 1 | 1 | 1 | - | 0.306 | 0.274 | 1 | 1 |
| Lb fi, W | 0.151 | 1 | 0.614 | 0.151 | 0.372 | 1 | 0.526 | **0.031** | 1 | 1 | 0.474 | 0.306 | - | 1 | **0.031** | **0.031** |
| Lb li, W | 0.134 | 1 | 0.552 | 0.134 | 0.415 | 1 | 0.472 | **0.027** | 1 | 1 | 0.425 | 0.274 | 1 | - | **0.027** | **0.027** |
| Lb am, W | 1 | 1 | 1 | 1 | **4.58E-09** | **0.018** | 1 | 1 | 1 | 1 | 1 | 1 | **0.031** | **0.027** | **-** | 1 |
| Lb af, W | 1 | 1 | 1 | 1 | **4.58E-09** | **0.018** | 1 | 1 | 1 | 1 | 1 | 1 | **0.031** | **0.027** | 1 | - |

g

| **Sway** | Cf fi, C | Cf li, C | Cf am, C | Cf af, C | Lb fi, C | Lb li, C | Lb am, C | Lb af, C | Cf fi, W | Cf li, W | Cf am, W | Cf af, W | Lb fi, W | Lb li, W | Lb am, W | Lb af, W |
| --- | --- | --- | --- | --- | --- | --- | --- | --- | --- | --- | --- | --- | --- | --- | --- | --- |
| Cf fi, C | - | 1 | 1 | 1 | 1 | 1 | 1 | 1 | 1 | 1 | 1 | 1 | **2.19E-06** | **9.26E-06** | 1 | 1 |
| Cf li, C | 1 | - | 1 | 1 | 1 | 1 | 1 | 1 | 1 | 1 | 1 | 1 | **2.19E-06** | **9.26E-06** | 1 | 1 |
| Cf am, C | 1 | 1 | - | 1 | 1 | 1 | 1 | 1 | 1 | 1 | 1 | 1 | **2.19E-06** | **9.26E-06** | 1 | 1 |
| Cf af, C | 1 | 1 | 1 | - | 1 | 1 | 1 | 1 | 1 | 1 | 1 | 1 | **2.19E-06** | **9.26E-06** | 1 | 1 |
| Lb fi, C | 1 | 1 | 1 | 1 | - | 1 | 1 | 1 | 1 | 1 | 1 | 1 | **2.19E-06** | **9.26E-06** | 1 | 1 |
| Lb li, C | 1 | 1 | 1 | 1 | 1 | - | 1 | 1 | 1 | 1 | 1 | 1 | **0.006** | **0.016** | 1 | 1 |
| Lb am, C | 1 | 1 | 1 | 1 | 1 | 1 | - | 1 | 1 | 1 | 1 | 1 | **2.19E-06** | **9.26E-06** | 1 | 1 |
| Lb af, C | 1 | 1 | 1 | 1 | 1 | 1 | 1 | - | 1 | 1 | 1 | 1 | **2.19E-06** | **9.26E-06** | 1 | 1 |
| Cf fi, W | 1 | 1 | 1 | 1 | 1 | 1 | 1 | 1 | - | 1 | 1 | 1 | **0.000** | **0.001** | 1 | 1 |
| Cf li, W | 1 | 1 | 1 | 1 | 1 | 1 | 1 | 1 | 1 | - | 1 | 1 | **2.19E-06** | **9.26E-06** | 1 | 1 |
| Cf am, W | 1 | 1 | 1 | 1 | 1 | 1 | 1 | 1 | 1 | 1 | - | 1 | 0.210 | 0.484 | 1 | 1 |
| Cf af, W | 1 | 1 | 1 | 1 | 1 | 1 | 1 | 1 | 1 | 1 | 1 | - | **0.000** | **0.001** | 1 | 1 |
| Lb fi, W | **2.19E-06** | **2.19E-06** | **2.19E-06** | **2.19E-06** | **2.19E-06** | **0.006** | **2.19E-06** | **2.19E-06** | **0.000** | **2.19E-06** | 0.210 | **0.000** | **-** | 1 | **0.000** | **2.19E-06** |
| Lb li, W | **9.26E-06** | **9.26E-06** | **9.26E-06** | **9.26E-06** | **9.26E-06** | **0.016** | **9.26E-06** | **9.26E-06** | **0.001** | **9.26E-06** | 0.484 | **0.001** | 1 | - | **0.002** | **9.26E-06** |
| Lb am, W | 1 | 1 | 1 | 1 | 1 | 1 | 1 | 1 | 1 | 1 | 1 | 1 | **0.000** | **0.002** | **-** | 1 |
| Lb af, W | 1 | 1 | 1 | 1 | 1 | 1 | 1 | 1 | 1 | 1 | 1 | 1 | **2.19E-06** | **9.26E-06** | 1 | - |

h

| **Walk** | Cf fi, C | Cf li, C | Cf am, C | Cf af, C | Lb fi, C | Lb li, C | Lb am, C | Lb af, C | Cf fi, W | Cf li, W | Cf am, W | Cf af, W | Lb fi, W | Lb li, W | Lb am, W | Lb af, W |
| --- | --- | --- | --- | --- | --- | --- | --- | --- | --- | --- | --- | --- | --- | --- | --- | --- |
| Cf fi, C | - | 1 | 1 | 1 | 1 | 1 | 1 | 1 | **0.021** | 1 | 1 | 1 | 1 | 0.057 | 1 | 1 |
| Cf li, C | 1 | - | 1 | 1 | 1 | 1 | 1 | 1 | 0.142 | 1 | 1 | 1 | 1 | 0.345 | 1 | 1 |
| Cf am, C | 1 | 1 | - | 1 | 1 | 1 | 1 | 1 | **0.021** | 1 | 1 | 1 | 1 | 0.057 | 1 | 1 |
| Cf af, C | 1 | 1 | 1 | - | 1 | 1 | 1 | 1 | 0.172 | 1 | 1 | 1 | 1 | 0.413 | 1 | 1 |
| Lb fi, C | 1 | 1 | 1 | 1 | - | 1 | 1 | 1 | 0.848 | 1 | 1 | 1 | 1 | 1 | 1 | 1 |
| Lb li, C | 1 | 1 | 1 | 1 | 1 | - | 1 | 1 | 1 | 1 | 1 | 1 | 1 | 1 | 1 | 1 |
| Lb am, C | 1 | 1 | 1 | 1 | 1 | 1 | - | 1 | **0.021** | 1 | 1 | 1 | 1 | 0.057 | 1 | 1 |
| Lb af, C | 1 | 1 | 1 | 1 | 1 | 1 | 1 | - | **0.021** | 1 | 1 | 1 | 1 | 0.057 | 1 | 1 |
| Cf fi, W | **0.021** | 0.142 | **0.021** | 0.172 | 0.848 | 1 | **0.021** | **0.021** | **-** | 0.155 | 0.152 | 1 | 1 | 1 | 0.150 | **0.021** |
| Cf li, W | 1 | 1 | 1 | 1 | 1 | 1 | 1 | 1 | 0.155 | - | 1 | 1 | 1 | 0.376 | 1 | 1 |
| Cf am, W | 1 | 1 | 1 | 1 | 1 | 1 | 1 | 1 | 0.152 | 1 | - | 1 | 1 | 0.368 | 1 | 1 |
| Cf af, W | 1 | 1 | 1 | 1 | 1 | 1 | 1 | 1 | 1 | 1 | 1 | - | 1 | 1 | 1 | 1 |
| Lb fi, W | 1 | 1 | 1 | 1 | 1 | 1 | 1 | 1 | 1 | 1 | 1 | 1 | - | 1 | 1 | 1 |
| Lb li, W | 0.057 | 0.345 | 0.057 | 0.413 | 1 | 1 | 0.057 | 0.057 | 1 | 0.376 | 0.368 | 1 | 1 | - | 0.364 | 0.057 |
| Lb am, W | 1 | 1 | 1 | 1 | 1 | 1 | 1 | 1 | 0.150 | 1 | 1 | 1 | 1 | 0.364 | - | 1 |
| Lb af, W | 1 | 1 | 1 | 1 | 1 | 1 | 1 | 1 | **0.021** | 1 | 1 | 1 | 1 | 0.057 | 1 | - |
